# Supplementary material
Source: Springer Nature journal article supplement (https://www.springermedizin.de/resource/supplementary/12957_2013_1408_MOESM12_ESM.pdf/9562532)

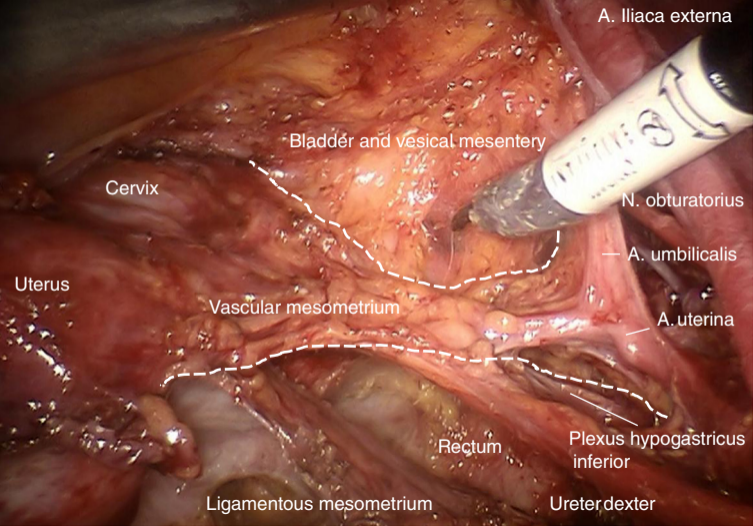

Supplement: MOESM12 [file 9562532]
